# Supplementary material for: Recognition and unfolding of human telomeric G-quadruplex by short peptide binding identified from the HRDC domain of BLM helicase
Source: Royal Society of Chemistry journal article supplement (doi:10.1039/d2ra03646k), 2022-01-01
Supplement: d2ra03646k1.pdf [file d2ra03646k1.pdf]

**Recognition and Unfolding of Human Telomeric G-quadruplex by short peptide binding identified from HRDC domain of BLM Helicase**

Taniya Sharma<sup>a</sup>, Nikita Kundu<sup>a</sup>, Sarvpreet Kaur<sup>a</sup>, Amlan Chakraborty<sup>b</sup>, Aman Kumar Mahto<sup>b</sup>, Rikeshwer Prasad Dewangan<sup>b</sup>, Jadala Shankaraswamy<sup>d</sup>, Sarika Saxena<sup>a\*</sup>

<sup>a</sup>Amity Institute of Biotechnology, Amity University Uttar Pradesh, Noida 201313, India.

<sup>b</sup>Division of Immunology, Immunity to Infection and Respiratory Medicine (DIIRM), School of Biological Sciences, University of Manchester.

<sup>c</sup>Department of Pharmaceutical Chemistry, School of Pharmaceutical Education and Research, Jamia Hamdard.

<sup>d</sup>Department of Fruit Science, College of Horticulture, Mojerla, Sri Konda Laxman Telangana State Horticultural University, 509382, Telangana, India.

Note: Taniya Sharma, Nikita Kundu, and Sarvpreet Kaur share equal contribution.

## Supporting Information

|                                                                                                                                                                                                                                                                                    |            |
|------------------------------------------------------------------------------------------------------------------------------------------------------------------------------------------------------------------------------------------------------------------------------------|------------|
| <b>Table of Contents</b>                                                                                                                                                                                                                                                           | <b>1-2</b> |
| <b>1. Figure S1</b> ESI spectra of peptide and <b>Figure S2</b> HPLC chromatogram                                                                                                                                                                                                  | <b>3</b>   |
| <b>2. Figure S3</b> Thermal difference spectra of 4 $\mu$ M HTPu-Var-1 G4 in buffer containing 100 mM KCl with and without Peptide (1:40) ratio.                                                                                                                                   | <b>4</b>   |
| <b>3. Figure S4</b> Temperature dependent CD spectra of 4 $\mu$ M HTPu-Var-1 G4 in buffer containing 100 mM KCl with and without Peptide DNA: Peptide (1:0) (A), (1:10) (B), (1:40) (C), (1:80) (D), 1:100 (E), comparative CD melting profile of all DNA:Peptide ratio (F) ratio. | <b>5</b>   |
| <b>4. Figure S5:</b> Native gel electrophoresis of 6 $\mu$ M HTPu-Var-1 G4 in buffer containing 100 mM KCl and DNA: Peptide ratios (1:0) Lane 2 (1:10), Lane 3 (1 : 20), Lane 4 (1 : 40), Lane 5 (1 : 80), Lane 6 (1 : 120) and (1:160) Lane 7 respectively.                       | <b>6</b>   |

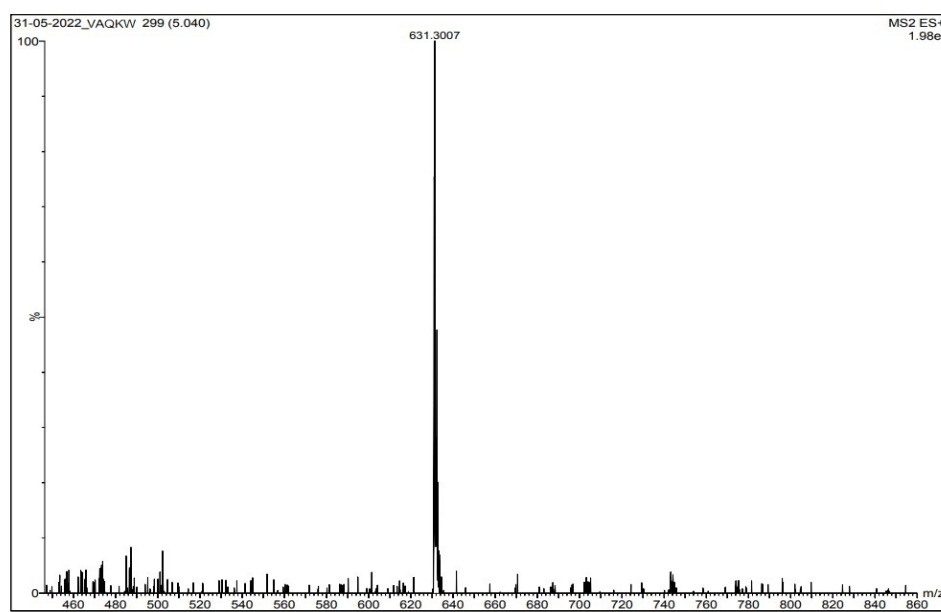

**Fig. S1** ESI mass spectra of VAQKW

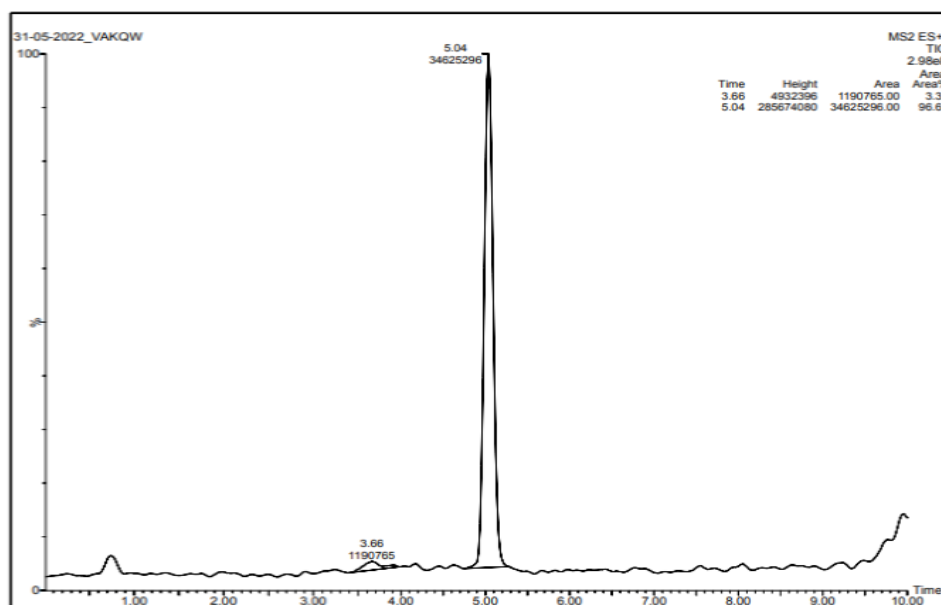

**Fig. S2** HPLC chromatogram of VAQKW

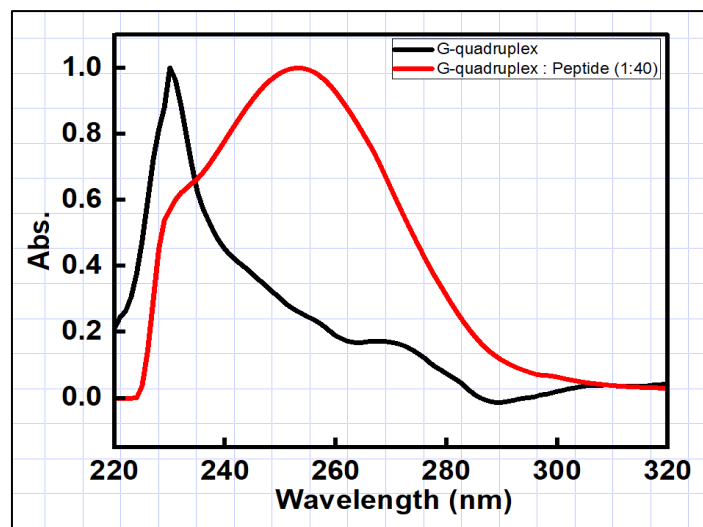

Fig. S3 Thermal difference spectra of HTPu-Var-1 G4 obtained after subtracting the lower temperature (20°C) curve from higher temperature curve (95°C) without peptide (black) and DNA:Peptide complex (1:40) red.

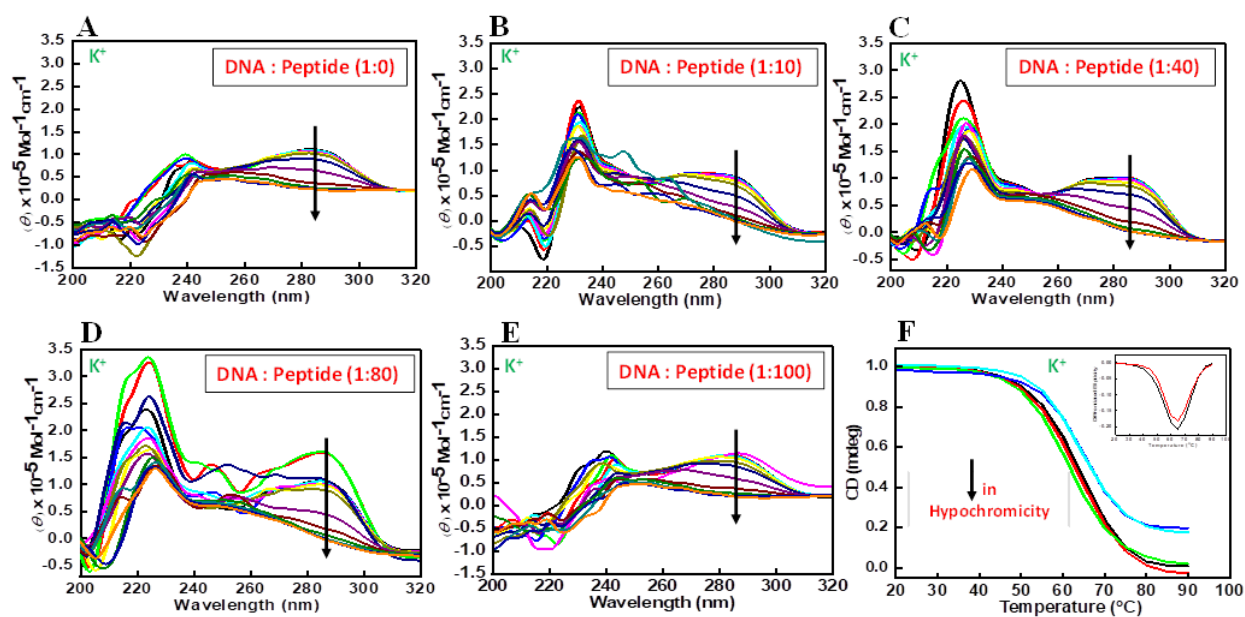

Fig. S4 Temperature dependent CD spectra of HTPu-Var-1 G DNA: Peptide (1:0) (A), (1:10) (B), (1:40) (C), (1:80) (D), (1:100) (E). Comparative CD melting profile of all DNA :Peptide ratio (F).
